# Supplementary material for: A magnetoreception system constructed by a dysprosium metallofullerene and nitroxide radical
Source: Royal Society of Chemistry journal article supplement (doi:10.1039/c7dt01761h), 2017-01-01
Supplement: c7dt01761h1.pdf [file c7dt01761h1.pdf]

Electronic Supplementary Information

## **Magnetoreception System Constructed by Dysprosium Metallofullerene and Nitroxide Radical**

Yongjian Li,<sup>a,b</sup> Taishan Wang,<sup>\*,a</sup> Chong Zhao,<sup>a</sup> Yu Qin,<sup>a</sup> Haibing Meng,<sup>a,b</sup> Mingzhe

Nie,<sup>a,b</sup> Li Jiang,<sup>a</sup> Chunru Wang<sup>\*,a</sup>

<sup>a</sup>. Key Laboratory of Molecular Nanostructure and Nanotechnology, Beijing National Laboratory for Molecular Sciences, Institute of Chemistry, Chinese Academy of Sciences, Beijing 100190, P.R. China

<sup>b</sup>. University of Chinese Academy of Sciences, Beijing 100049, P.R. China

\* E-mail: wangtais@iccas.ac.cn; crwang@iccas.ac.cn.

### **Contents**

#### **1. Synthesis methods**

##### **1-1. Synthesis of Dy<sub>3</sub>N@C<sub>80</sub>, Sc<sub>3</sub>N@C<sub>80</sub> and Y<sub>3</sub>N@C<sub>80</sub>**

##### **1-2. Synthesis of derivatives containing nitroxide radical of Dy<sub>3</sub>N@C<sub>80</sub>, Sc<sub>3</sub>N@C<sub>80</sub> and Y<sub>3</sub>N@C<sub>80</sub>**

##### **1-3. Synthesis of Sc<sub>3</sub>N@C<sub>80</sub>PNOH**

#### **2. Characterizations methods of fullerenes and their derivatives**

#### **3. Theoretical calculation on Y<sub>3</sub>N@C<sub>80</sub>PNO· regioisomers**

#### **4. Supporting figures**

#### **5. References**

## 1. Synthesis methods

### 1-1. Synthesis of Dy<sub>3</sub>N@C<sub>80</sub>, Sc<sub>3</sub>N@C<sub>80</sub> and Y<sub>3</sub>N@C<sub>80</sub>

Dy<sub>3</sub>N@C<sub>80</sub>, Sc<sub>3</sub>N@C<sub>80</sub> and Y<sub>3</sub>N@C<sub>80</sub> were synthesized by arc-discharging method. Graphite rods were core-drilled and subsequently packed with a mixture of Dy/Ni<sub>2</sub>, Sc/Ni<sub>2</sub>, Y/Ni<sub>2</sub> and graphite powder in a weight ratio of Dy:C = 4:1, Sc:C = 3:1, Y:C = 4:1, respectively. These rods were then vaporized in a Krätschmer-Huffman generator at 194 Torr He and 6 Torr N<sub>2</sub>. The resulting soot was Soxlet-extracted with toluene for 24 h. The target products were isolated by high-performance liquid chromatography (HPLC) using Buckyprep column, together with results of MALDI-TOF MS analysis, as shown in Figure S1, S2 and S3.

### 1-2. Synthesis of derivatives containing nitroxide radical of Dy<sub>3</sub>N@C<sub>80</sub>, Sc<sub>3</sub>N@C<sub>80</sub> and Y<sub>3</sub>N@C<sub>80</sub>

Dy<sub>3</sub>N@C<sub>80</sub>, Sc<sub>3</sub>N@C<sub>80</sub> and Y<sub>3</sub>N@C<sub>80</sub> were heated with N-ethylglycine and 1-oxy-2,2,6,6-tetramethylpiperidin-4-yl 1-acetylpiperidine-4-carboxylate, which was synthesized as described in literature methods<sup>1</sup> at 120 °C, to give corresponding fullerene derivatives containing nitroxide radical with yields of nearly 70% in toluene solution for 50 min, respectively. Pure derivatives were isolated by high-performance liquid chromatography (HPLC) using Buckprep column.

### 1-3. Synthesis of Sc<sub>3</sub>N@C<sub>80</sub>PNOH

To a solution of ~0.5 mg of the nitroxide derivative Sc<sub>3</sub>N@C<sub>80</sub>PNO· in ~2 ml toluene was added ~1 mg *p*-Toluenesulfonohydrazide, and stirred under air for about 15 min.

## 2. Characterizations methods of fullerenes and their derivatives

UV/vis-NIR spectra of purified metallofullerenes and their derivatives were collected on Lambda 950 UV/vis/NIR Spectrometer (PerkinElmer Instruments). ESR spectra were measured on a JEOL JEF FA200 X-band spectra. The samples were degassed and the oxygen was removed from the solutions. All of the samples were dissolved in toluene solution at the same concentration. <sup>1</sup>H NMR spectra of Sc<sub>3</sub>N@C<sub>80</sub>PNO· was measured in chloroform-*d* on a Bruker 600 MHz spectrometer (Figure S4). The static magnetization was measured with a Quantum Design MPMS XL-7 system between 2 and 300 K in magnetic fields up to 0.1 T. The net mass of the samples is in the µg range. The samples were measured in a capsule with negligible magnetism.

### **3. Theoretical calculation on $\text{Y}_3\text{N@C}_{80}\text{PNO}$ regioisomers**

Density functional theory (DFT) computations were performed using the Gaussian 09 program package. The [5,6] and [6,6] isomers of  $\text{Y}_3\text{N@C}_{80}$  were optimized at the UB3LYP method with a pseudopotential lanl2dz basis set for yttrium atoms and a 6-31G\* basis set for carbon, nitrogen and oxygen atoms.

### **4. Supporting figures**

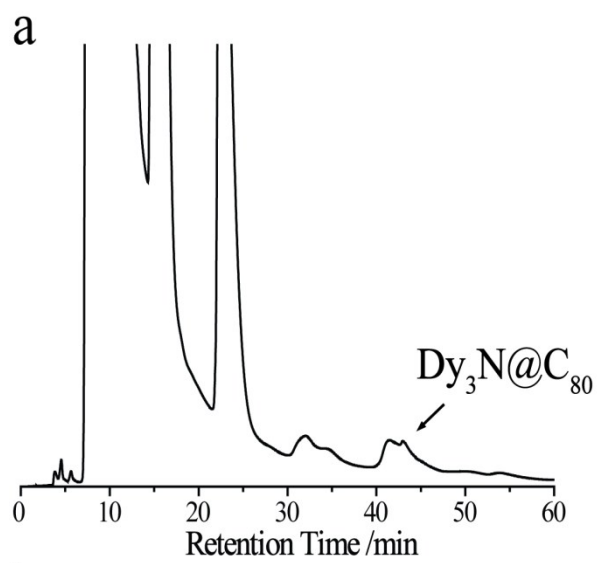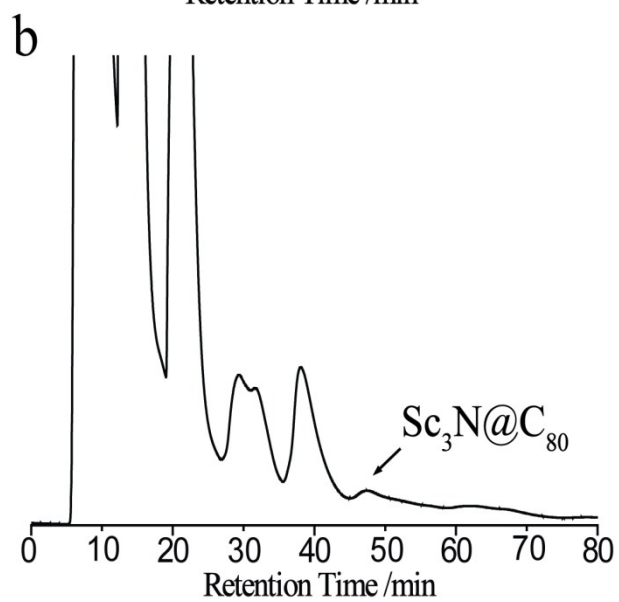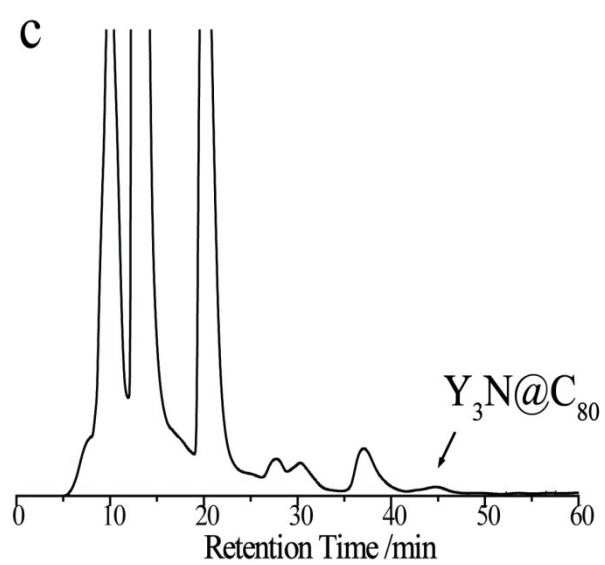

**Fig S1.** The first stage HPLC of toluene extract of the soot containing endohedral metallofullerenes (20 × 250 mm Buckyprep column; flow rate 12 mL/min; toluene as eluent). (a) Dy<sub>3</sub>N@C<sub>80</sub>, (b) Sc<sub>3</sub>N@C<sub>80</sub> and (c) Y<sub>3</sub>N@C<sub>80</sub>.

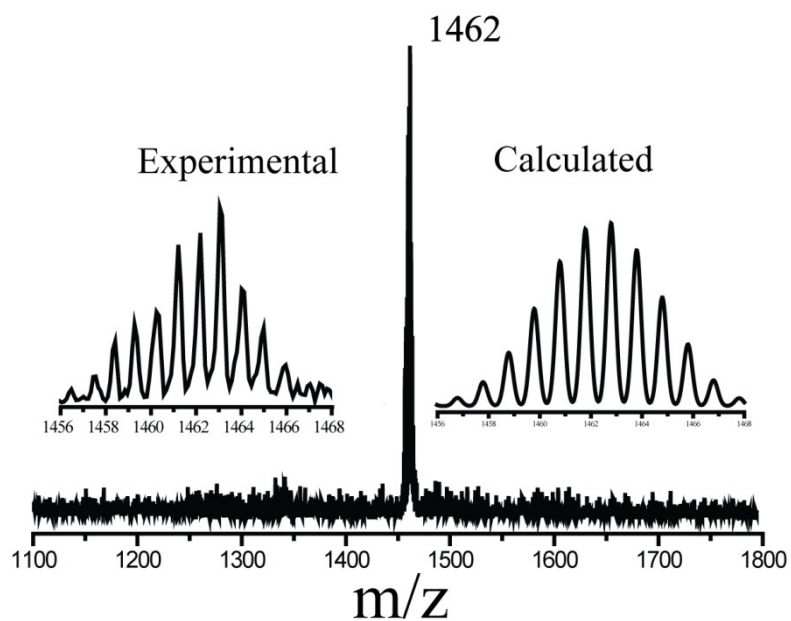

**Fig S2.** MALDI-TOF mass spectra of purified Dy<sub>3</sub>N@C<sub>80</sub>. The insets show the experimental and calculated isotope distributions of Dy<sub>3</sub>N@C<sub>80</sub>.

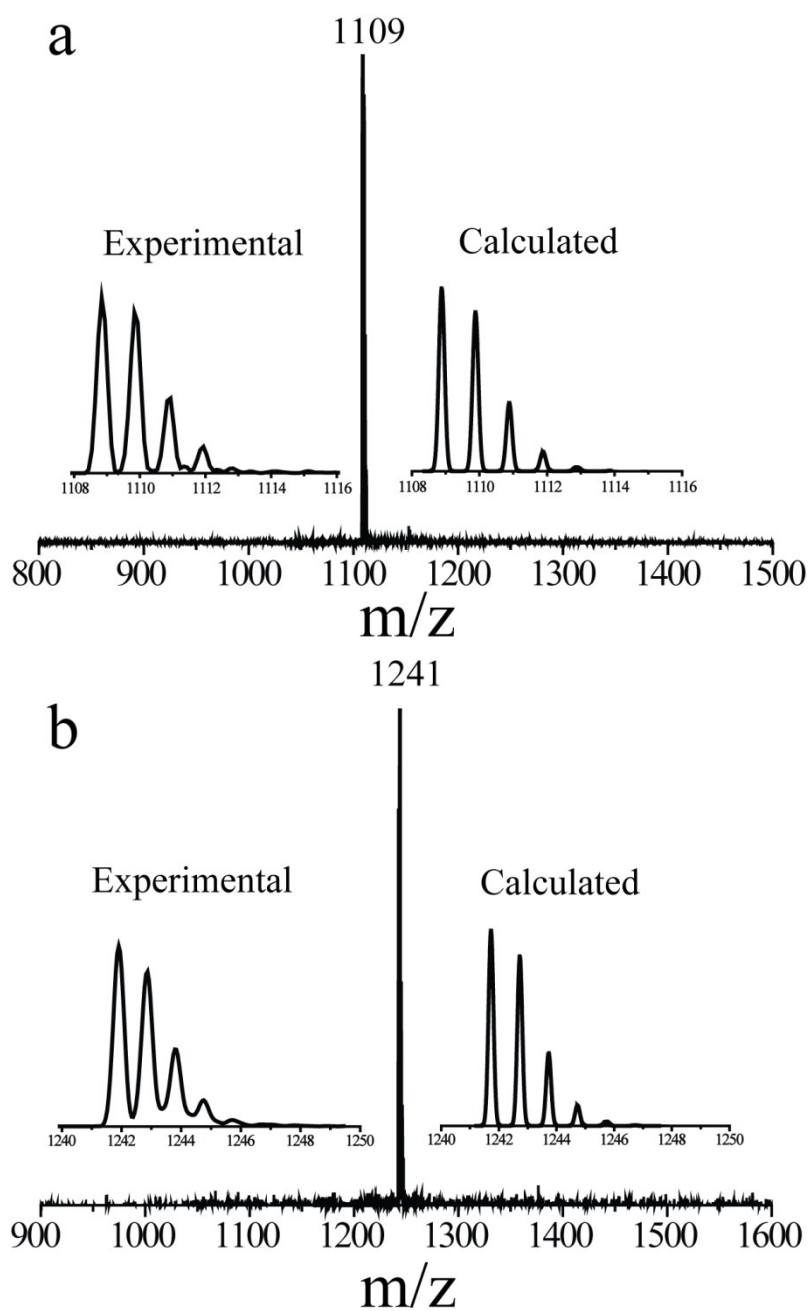

**Fig S3.** MALDI-TOF mass spectra of purified (a) Sc<sub>3</sub>N@C<sub>80</sub> and (b) Y<sub>3</sub>N@C<sub>80</sub>. The insets show the experimental and calculated isotope distributions of Sc<sub>3</sub>N@C<sub>80</sub> and Y<sub>3</sub>N@C<sub>80</sub>.

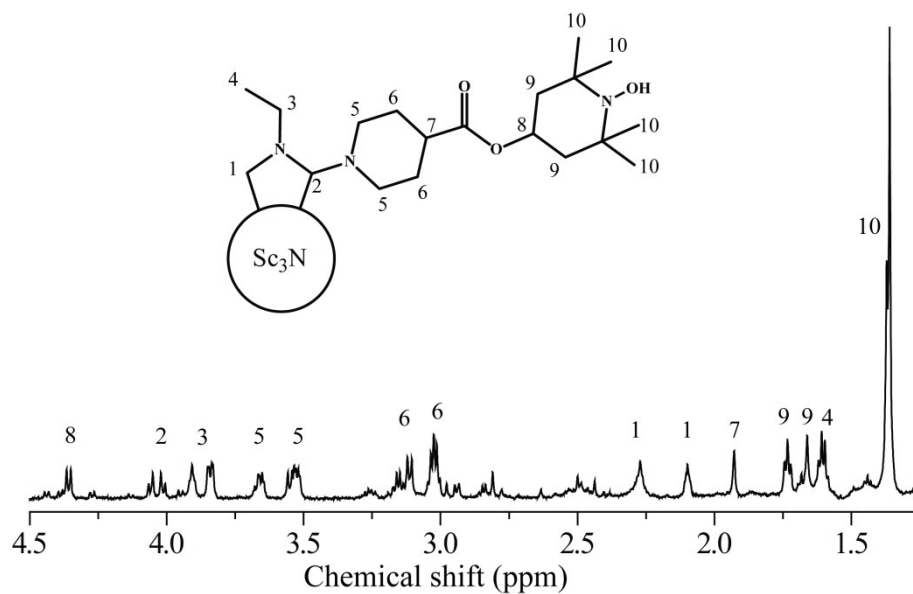

**Figure S4.**  $^1\text{H}$  NMR spectra of  $\text{Sc}_3\text{N}@\text{C}_{80}\text{PNOH}$ . The  $^1\text{H}$  NMR spectra of  $\text{Sc}_3\text{N}@\text{C}_{80}\text{PNOH}$  between 1.2 and 4.5 ppm at 600 MHz in chloroform-*d* ( $\text{CDCl}_3$ ) at 293 K.

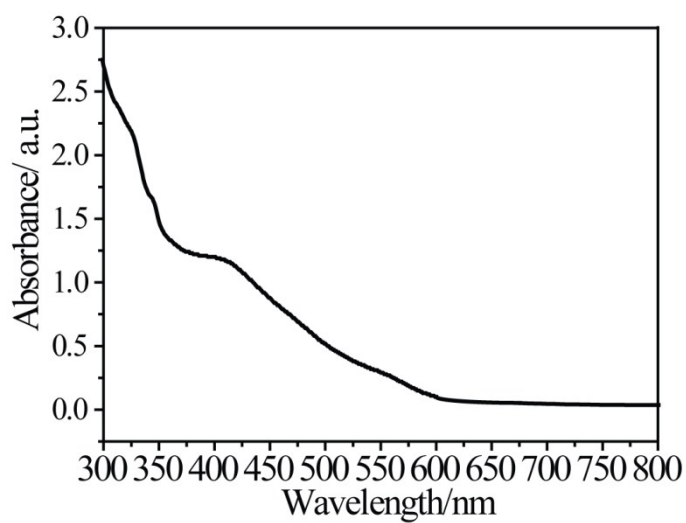

**Fig S5.** UV/Vis-NIR spectra of purified  $\text{Dy}_3\text{N}@\text{C}_{80}\text{-I}_h$  in toluene.

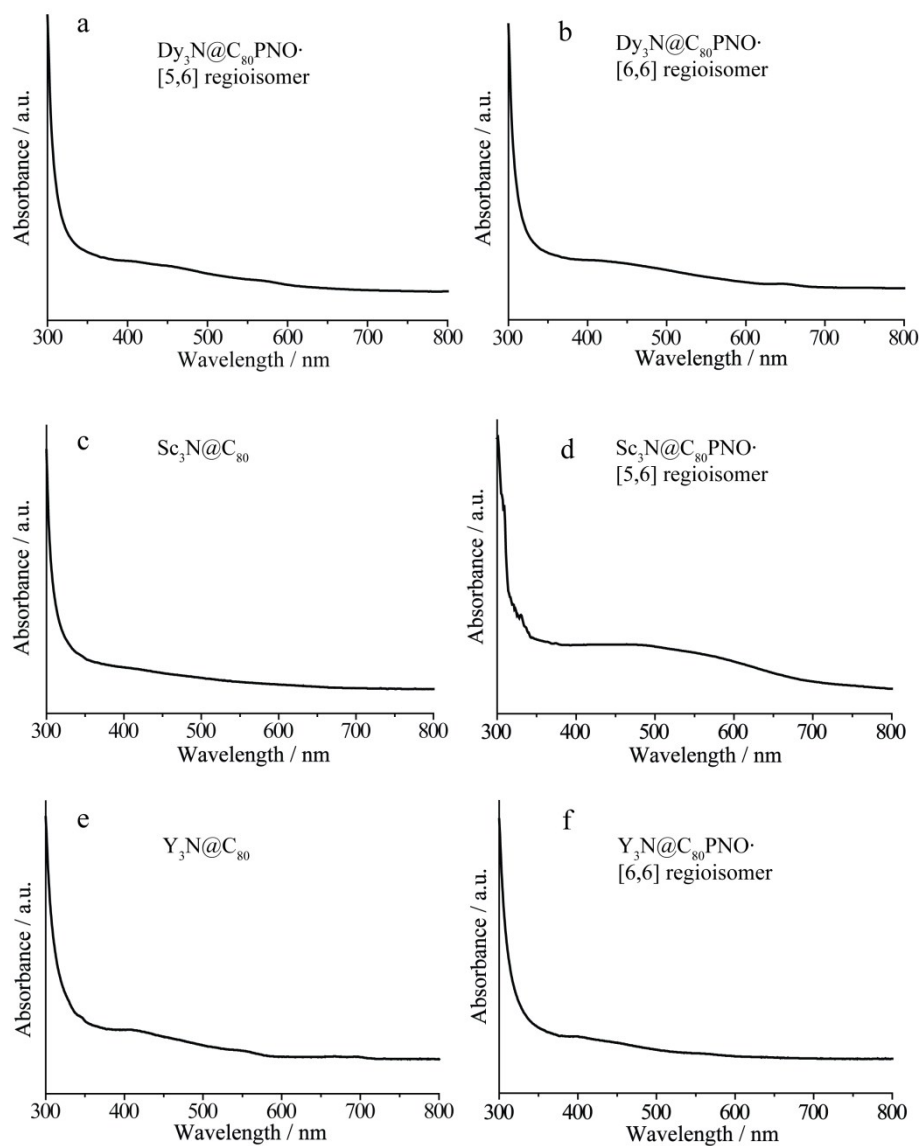

**Fig S6.** UV/Vis-NIR spectra of (a) [5,6], (b) [6,6] isomers of  $\text{Dy}_3\text{N@C}_{80}\text{PNO}^\bullet$ , (c)  $\text{Sc}_3\text{N@C}_{80}$ , (d) [5,6] isomers of  $\text{Sc}_3\text{N@C}_{80}\text{PNO}^\bullet$ , (e)  $\text{Y}_3\text{N@C}_{80}$  and (f) [6,6] isomers of  $\text{Y}_3\text{N@C}_{80}\text{PNO}^\bullet$  in toluene.



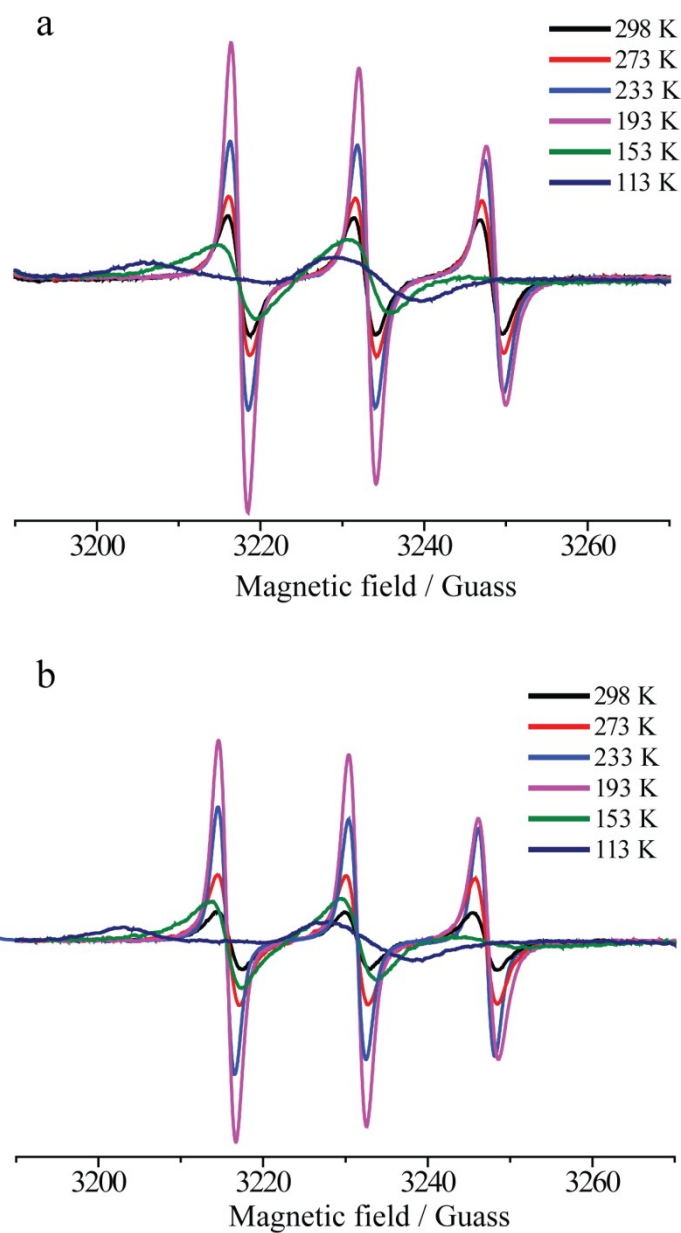

**Fig S7.** The ESR spectra of [5,6] and [6,6] isomers of  $\text{Dy}_3\text{N@C}_{80}\text{PNO}^\bullet$  at variable temperature in toluene solution.

**a**  $\text{Dy}_3\text{N}@C_{80}\text{PNO}\cdot$  [5,6] regioisomer

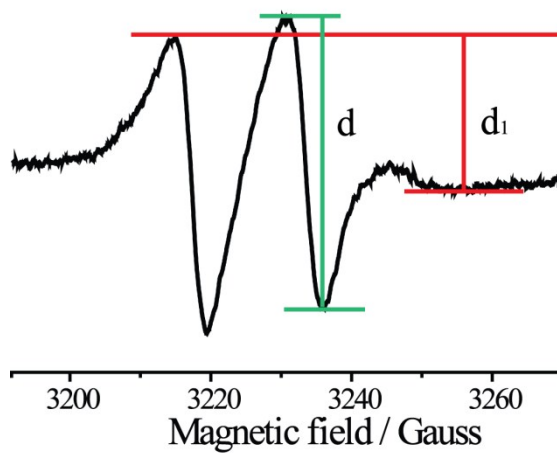

**b**  $\text{Dy}_3\text{N}@C_{80}\text{PNO}\cdot$  [6,6] regioisomer

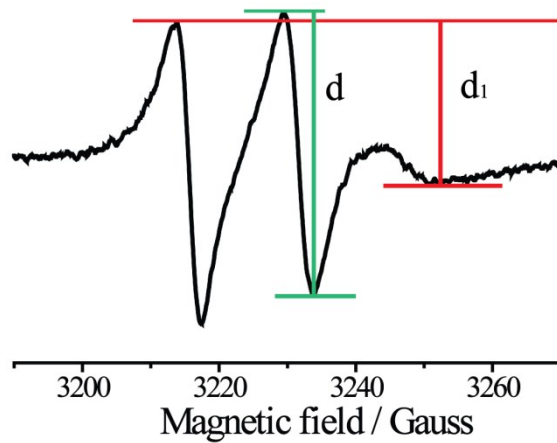

$\text{Sc}_3\text{N}@C_{80}\text{PNO}\cdot$  [5,6] regioisomer

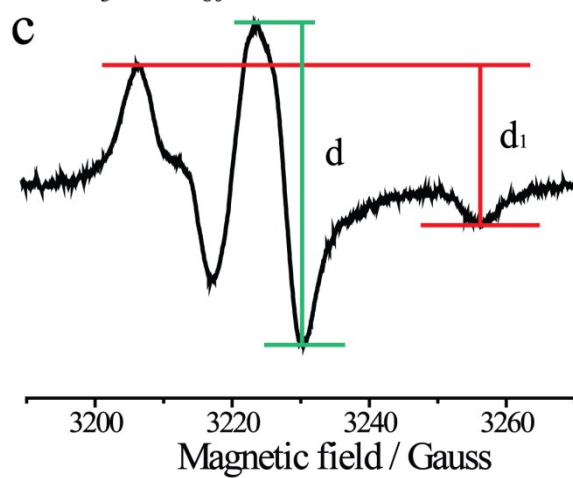

**Fig S8.** ESR spectra of (a)  $\text{Dy}_3\text{N}@C_{80}\text{PNO}\cdot$  [5,6] regioisomer, (b)  $\text{Dy}_3\text{N}@C_{80}\text{PNO}\cdot$  [6,6]

regioisomer and (c) Dy<sub>3</sub>N@C<sub>80</sub>PNO• [6,6] regioisomer at 153 K.

**Table 1:** Parameter d<sub>1</sub>/d of the different paramagnetic system at 153K.

| Sample                                                   | d <sub>1</sub> /d |
|----------------------------------------------------------|-------------------|
| Dy <sub>3</sub> N@C <sub>80</sub> PNO• [6,6] regioisomer | 0.60              |
| Dy <sub>3</sub> N@C <sub>80</sub> PNO• [5,6] regioisomer | 0.53              |
| Sc <sub>3</sub> N@C <sub>80</sub> PNO• [5,6] regioisomer | 0.51              |

**References:**

1. Li, Y. J.; Lei, X. G.; Lawler, R. G.; Murata, Y.; Komatsu, K and Turro, N. J. D. *J. Phys. Chem. Lett.* 2010, **1**, 2135-2138.
